# Supplementary material for: Involvement of the Calmodulin-like Protein Gene VaCML92 in Grapevine Abiotic Stress Response and Stilbene Production
Source: MDPI journal article supplement (doi:10.3390/ijms242115827), 2023-10-31
Supplement: s1 [file s1]

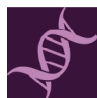

*Supplementary Materials*

# Involvement of the Calmodulin-like Protein Gene *VaCML92* in Grapevine Abiotic Stress Response and Stilbene Production

Olga A. Aleynova, Konstantin V. Kiselev, Andrey R. Suprun, Alexey A. Ananov and Alexandra S. Dubrovina \*

Laboratory of Biotechnology, Federal Scientific Center of the East Asia Terrestrial Biodiversity, Far Eastern Branch of the Russian Academy of Sciences, 690022 Vladivostok, Russia; kiselev@biosoil.ru (K.V.K.)

\* Correspondence: dubrovina@biosoil.ru; Tel.: +8-423-2310410; Fax: +8-4232-310193

**Citation:** Aleynova, O.A.; Kiselev, K.V.; Suprun, A.R.; Ananov, A.A.; Dubrovina, A.S. Involvement of the Calmodulin-like Protein Gene *VaCML92* in Grapevine Abiotic Stress Response and Stilbene Production. *Int. J. Mol. Sci.* **2023**, *24*, 15827. <https://doi.org/10.3390/ijms242115827>

Academic Editor: Fabrizio Grassi

Received: 20 September 2023

Revised: 27 October 2023

Accepted: 30 October 2023

Published: 31 October 2023

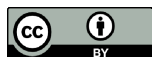

**Copyright:** © 2023 by the authors. Licensee MDPI, Basel, Switzerland. This article is an open access article distributed under the terms and conditions of the Creative Commons Attribution (CC BY) license (<https://creativecommons.org/licenses/by/4.0/>).

**Table S1.** Primers used for amplification of *Arabidopsis thaliana* and *Vitis amurensis* cDNAs in PCR.

| cDNA                                                                                                                       | Primers names                                                   | Primers sequences, 5'-3'                                                     |
|----------------------------------------------------------------------------------------------------------------------------|-----------------------------------------------------------------|------------------------------------------------------------------------------|
| <b>Primers for obtaining of the full <i>VaCML92</i> cDNA and generation the construction for plant cell transformation</b> |                                                                 |                                                                              |
| Full <i>VaCML92</i> cDNA obtaining                                                                                         | <i>VaCML92</i> -nachS<br><i>VaCML92</i> -KonA                   | 5'ATGAGAAGAGAAGATACAGCA,<br>5'CTAGCGCATCATAGCGGA                             |
| Overexpression of <i>VaCML92</i>                                                                                           | <i>VaCML92</i> -Hind-pSA<br>Ts<br><i>VaCML92</i> -Bam-pSA<br>Ta | 5'GCTCAAGCTTATGAGAAGAGAAGAT<br>ACAGC<br>5'TCGAGGATCCCTAGCGCATCATAGC<br>GGAGA |
| <b>Primers for real-time PCRs in <i>A. thaliana</i> plants and grapevine <i>V. amurensis</i> cell cultures</b>             |                                                                 |                                                                              |
| Overexpression of <i>VaCML92</i> transgenes                                                                                | <i>VaCML92</i> -real-S<br>pSAT-term-A                           | 5'AACGGAGATGGCGTCCTC,<br>5'GAGAGACTGGTGATTTTTGCG                             |
| Total overexpression of <i>VaCML92</i> gene                                                                                | <i>VaCML92</i> -real-S<br><i>VaCML92</i> -Kon-A                 | 5'AACGGAGATGGCGTCCTC,<br>5'CTAGCGCATCATAGCGGA                                |
| Overexpression of <i>VaCML92</i> endogen                                                                                   | <i>VaCML92</i> -real-S<br><i>VaCML92</i> -real-endo-A           | 5'AACGGAGATGGCGTCCTC,<br>5'TGGCTGTGGGTGATGAAGAAG                             |
| <i>VaActin1</i> (DQ517935)                                                                                                 | <i>VaActin</i> -realS<br><i>VaActin</i> -realA                  | 5'GTATTGTGCTGGATTCTGGTGA,<br>5'GCAAGGTCAAGACGAAGGATAG                        |
| <i>VaGAPDH</i> (AM437491)                                                                                                  | <i>VaGAPDH</i> -realS<br><i>VaGAPDH</i> -realA                  | 5'CACTGAAGATGATGTTGTTTCC,<br>5'GCTATTCCAGCCTTGGCAT                           |
| <i>AtEF</i> (XM_002864638)                                                                                                 | <i>AtEF</i> -1a-OT-s<br><i>AtEF</i> -1a-OT-a                    | 5'TGCCCTGGACATCGTGATT,<br>5'CTTGGGCTCGTTGATCTGGT                             |
| <i>AtGAPDH</i> (NM_111283.4)                                                                                               | <i>AtGapdh</i> -Real-s<br><i>AtGapdh</i> -Real-a                | 5'TTGGTGACAACAGGTCAAGCA,<br>5'AAACTTGTCGCTCAATGCAAT                          |
| <b>Primers for semiquantitative RT-PCR</b>                                                                                 |                                                                 |                                                                              |
| <i>nptII</i> (AY818371)                                                                                                    | NPTII-SER-S<br>NPTII-KON-A                                      | 5'ATTGACCACCAAGCGAAAC,<br>5'TCAGAAGAACTCGTCAAGAA                             |
| <i>VirB2</i> (KY000054)                                                                                                    | VIRB2-S<br>VIRB2-A                                              | 5'ATGCGATGCTTTGAAAGATACCG,<br>5'TTAGCCACCTCCAGTCAGCG                         |
